# Supplementary material for: Lifestyle-associated health risk indicators across a wide range of occupational groups: a cross-sectional analysis in 72,855 workers
Source: PubMed Central journal article supplement (PMC7641800; doi:10.1186/s12889-020-09755-6), 2020-11-04
Supplement: 12889_2020_9755_MOESM2_ESM.pdf [file 12889_2020_9755_MOESM2_ESM.pdf]

## Internal validity

**Additional file 2.** Mean age, women (%), no regular exercise (%), obesity (%) and daily smokers (%) in individuals with non-missing vs individuals with missing data for the variables cardiorespiratory fitness, physical work situation, sitting at work and sitting in leisure.

|                                 | Non-missing | Missing | Significance |
|---------------------------------|-------------|---------|--------------|
| <b>Mean age (SD):</b>           |             |         |              |
| Cardiorespiratory fitness       | 42 (12)     | 45 (13) | <0.001       |
| Physical work situation         | 42 (12)     | 42 (12) | <0.001       |
| Sitting at work                 | 42 (12)     | 42 (12) | <0.001       |
| Sitting in leisure              | 42 (12)     | 43 (12) | <0.001       |
| <b>Women (%):</b>               |             |         |              |
| Cardiorespiratory fitness       | 41          | 39      | <0.001       |
| Physical work situation         | 41          | 40      | 0.006        |
| Sitting at work                 | 41          | 40      | 0.071        |
| Sitting in leisure              | 41          | 40      | 0.01         |
| <b>No regular exercise (%):</b> |             |         |              |
| Cardiorespiratory fitness       | 34          | 39      | <0.001       |
| Physical work situation         | 35          | 35      | <0.001       |
| Sitting at work                 | 35          | 36      | <0.001       |
| Sitting in leisure              | 35          | 36      | <0.001       |
| <b>Obesity (%):</b>             |             |         |              |
| Cardiorespiratory fitness       | 16          | 23      | <0.001       |
| Physical work situation         | 18          | 16      | <0.001       |
| Sitting at work                 | 18          | 16      | <0.001       |
| Sitting in leisure              | 18          | 16      | <0.001       |
| <b>Daily smoking (%):</b>       |             |         |              |
| Cardiorespiratory fitness       | 8           | 10      | <0.001       |
| Physical work situation         | 8           | 9       | <0.001       |
| Sitting at work                 | 8           | 9       | <0.001       |
| Sitting in leisure              | 8           | 9       | <0.001       |
