# Supplementary material for: Lifestyle-associated health risk indicators across a wide range of occupational groups: a cross-sectional analysis in 72,855 workers
Source: PubMed Central journal article supplement (PMC7641800; doi:10.1186/s12889-020-09755-6), 2020-11-04
Supplement: 12889_2020_9755_MOESM3_ESM.pdf [file 12889_2020_9755_MOESM3_ESM.pdf]

## External validity

**Additional file 3.** Percent women and mean age in major and sub-major occupational groups according to national register\* (SCB) and the present study (HPB) data.

|                                       | % Women |     | Mean Age |     |
|---------------------------------------|---------|-----|----------|-----|
|                                       | SCB     | HPB | SCB      | HPB |
| 1 Managers                            | 38      | 35  | 47       | 47  |
| 2.1 Science and engineering           | 32      | 36  | 42       | 40  |
| 2.2 Health care                       | 79      | 67  | 44       | 43  |
| 2.3 Education                         | 73      | 79  | 44       | 44  |
| 2.4 Other professionals               | 51      | 51  | 43       | 42  |
| 3 Associate professionals             | 41      | 38  | 42       | 42  |
| 4 Administration and customer service | 62      | 65  | 40       | 42  |
| 5.1 Service and shop sales            | 54      | 53  | 37       | 43  |
| 5.2 Personal care                     | 83      | 90  | 43       | 42  |
| 6 Agricultural and forestry           | 31      | 36  | 41       | 42  |
| 7 Building and manufacturing          | 6       | 6   | 41       | 39  |
| 8.1 Mechanical manufacturing          | 22      | 19  | 41       | 42  |
| 8.2 Transport                         | 9       | 8   | 42       | 42  |
| 9 Elementary occupations              | 54      | 60  | 38       | 44  |

\* Statistics Sweden, [www.scb.se](http://www.scb.se)
