# Supplementary material for: Lifestyle-associated health risk indicators across a wide range of occupational groups: a cross-sectional analysis in 72,855 workers
Source: PubMed Central journal article supplement (PMC7641800; doi:10.1186/s12889-020-09755-6), 2020-11-04
Supplement: 12889_2020_9755_MOESM4_ESM.pdf [file 12889_2020_9755_MOESM4_ESM.pdf]

# Prevalence of health risk indicators in Men and Women

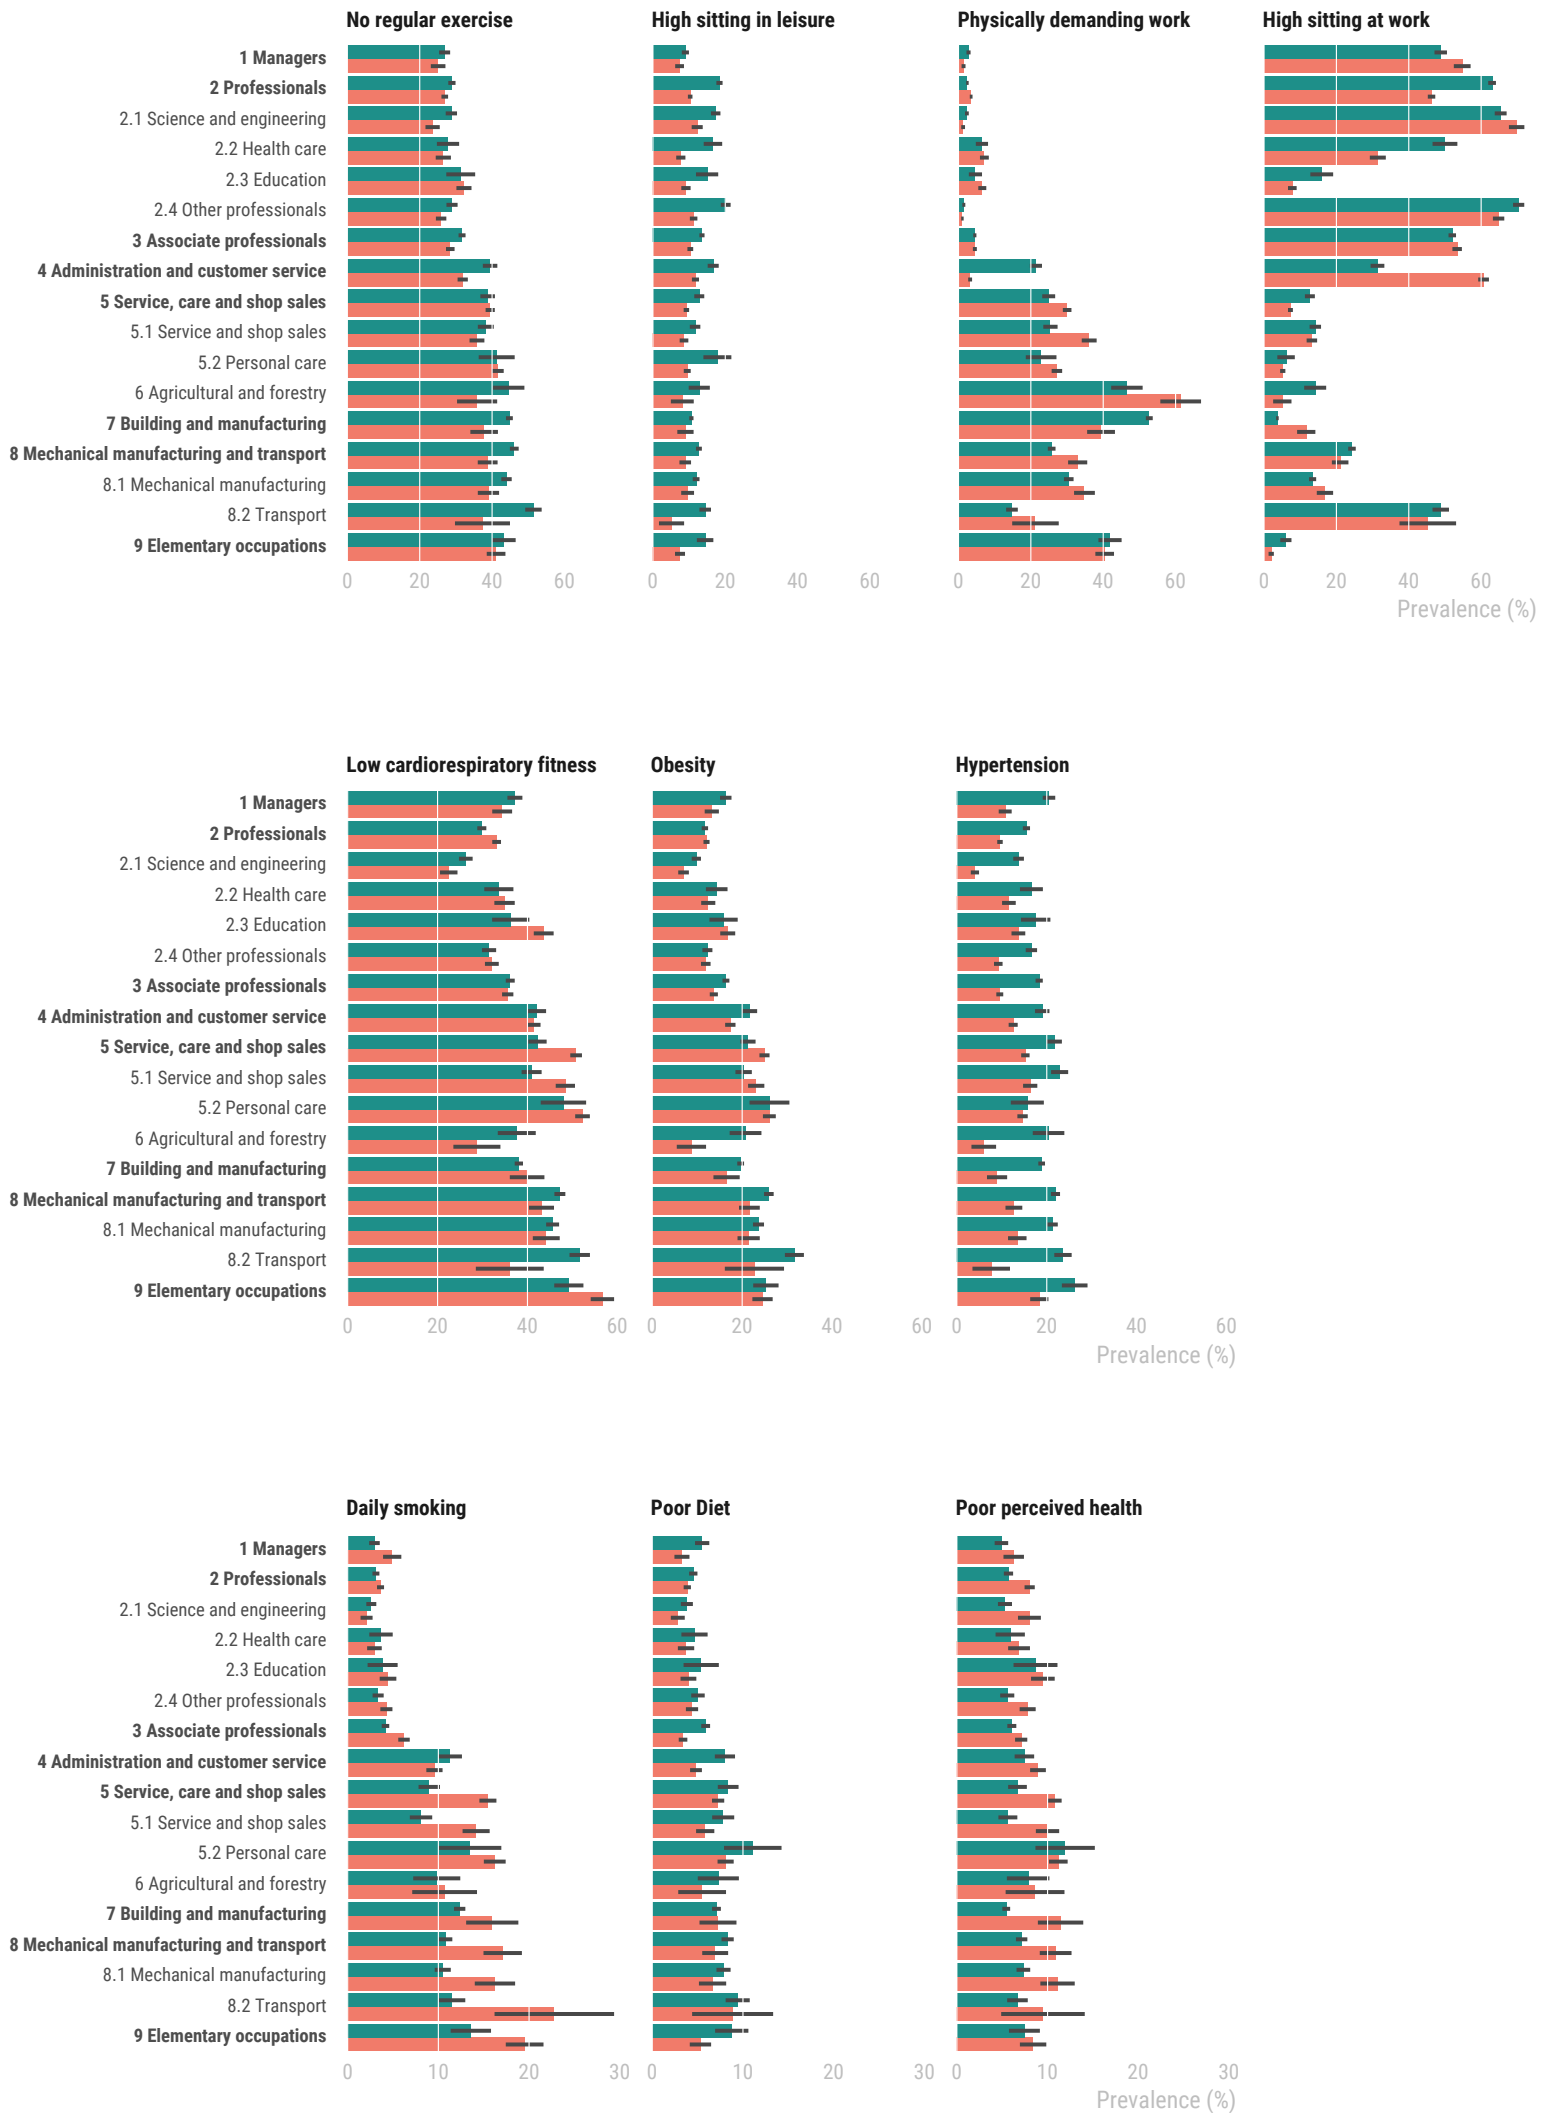

Additional file 4. Sex specific prevalence of risk indicators in major and sub-major occupational groups.
