# Supplementary material for: Lifestyle-associated health risk indicators across a wide range of occupational groups: a cross-sectional analysis in 72,855 workers
Source: PubMed Central journal article supplement (PMC7641800; doi:10.1186/s12889-020-09755-6), 2020-11-04

# Clustered health risk in Men and Women

## High-skilled white-collar occupations

- 1 Managers
- 2 Professionals
  - 2.1 Science and engineering
  - 2.2 Health care
  - 2.3 Education
  - 2.4 Other professionals
- 3 Associate professionals

## Low-skilled white-collar occupations

- 4 Administration and customer service
- 5 Service, care and shop sales
  - 5.1 Service and shop sales
  - 5.2 Personal care

## High-skilled blue-collar occupations

- 6 Agricultural and forestry
- 7 Building and manufacturing

## Low-skilled blue-collar occupations

- 8 Mechanical manufacturing and transport
  - 8.1 Mechanical manufacturing
  - 8.2 Transport
- 9 Elementary occupations

0.5 1.0 2.0 4.0  
Odds Ratio (95% CI)

Sample size (N) ● 2500 ● 5000 ● 7500 ● 10000

**Additional file 5.** Sex specific odds ratio (95% CI) for clustering of health risk indicators in relation to major and sub-major occupational groups.

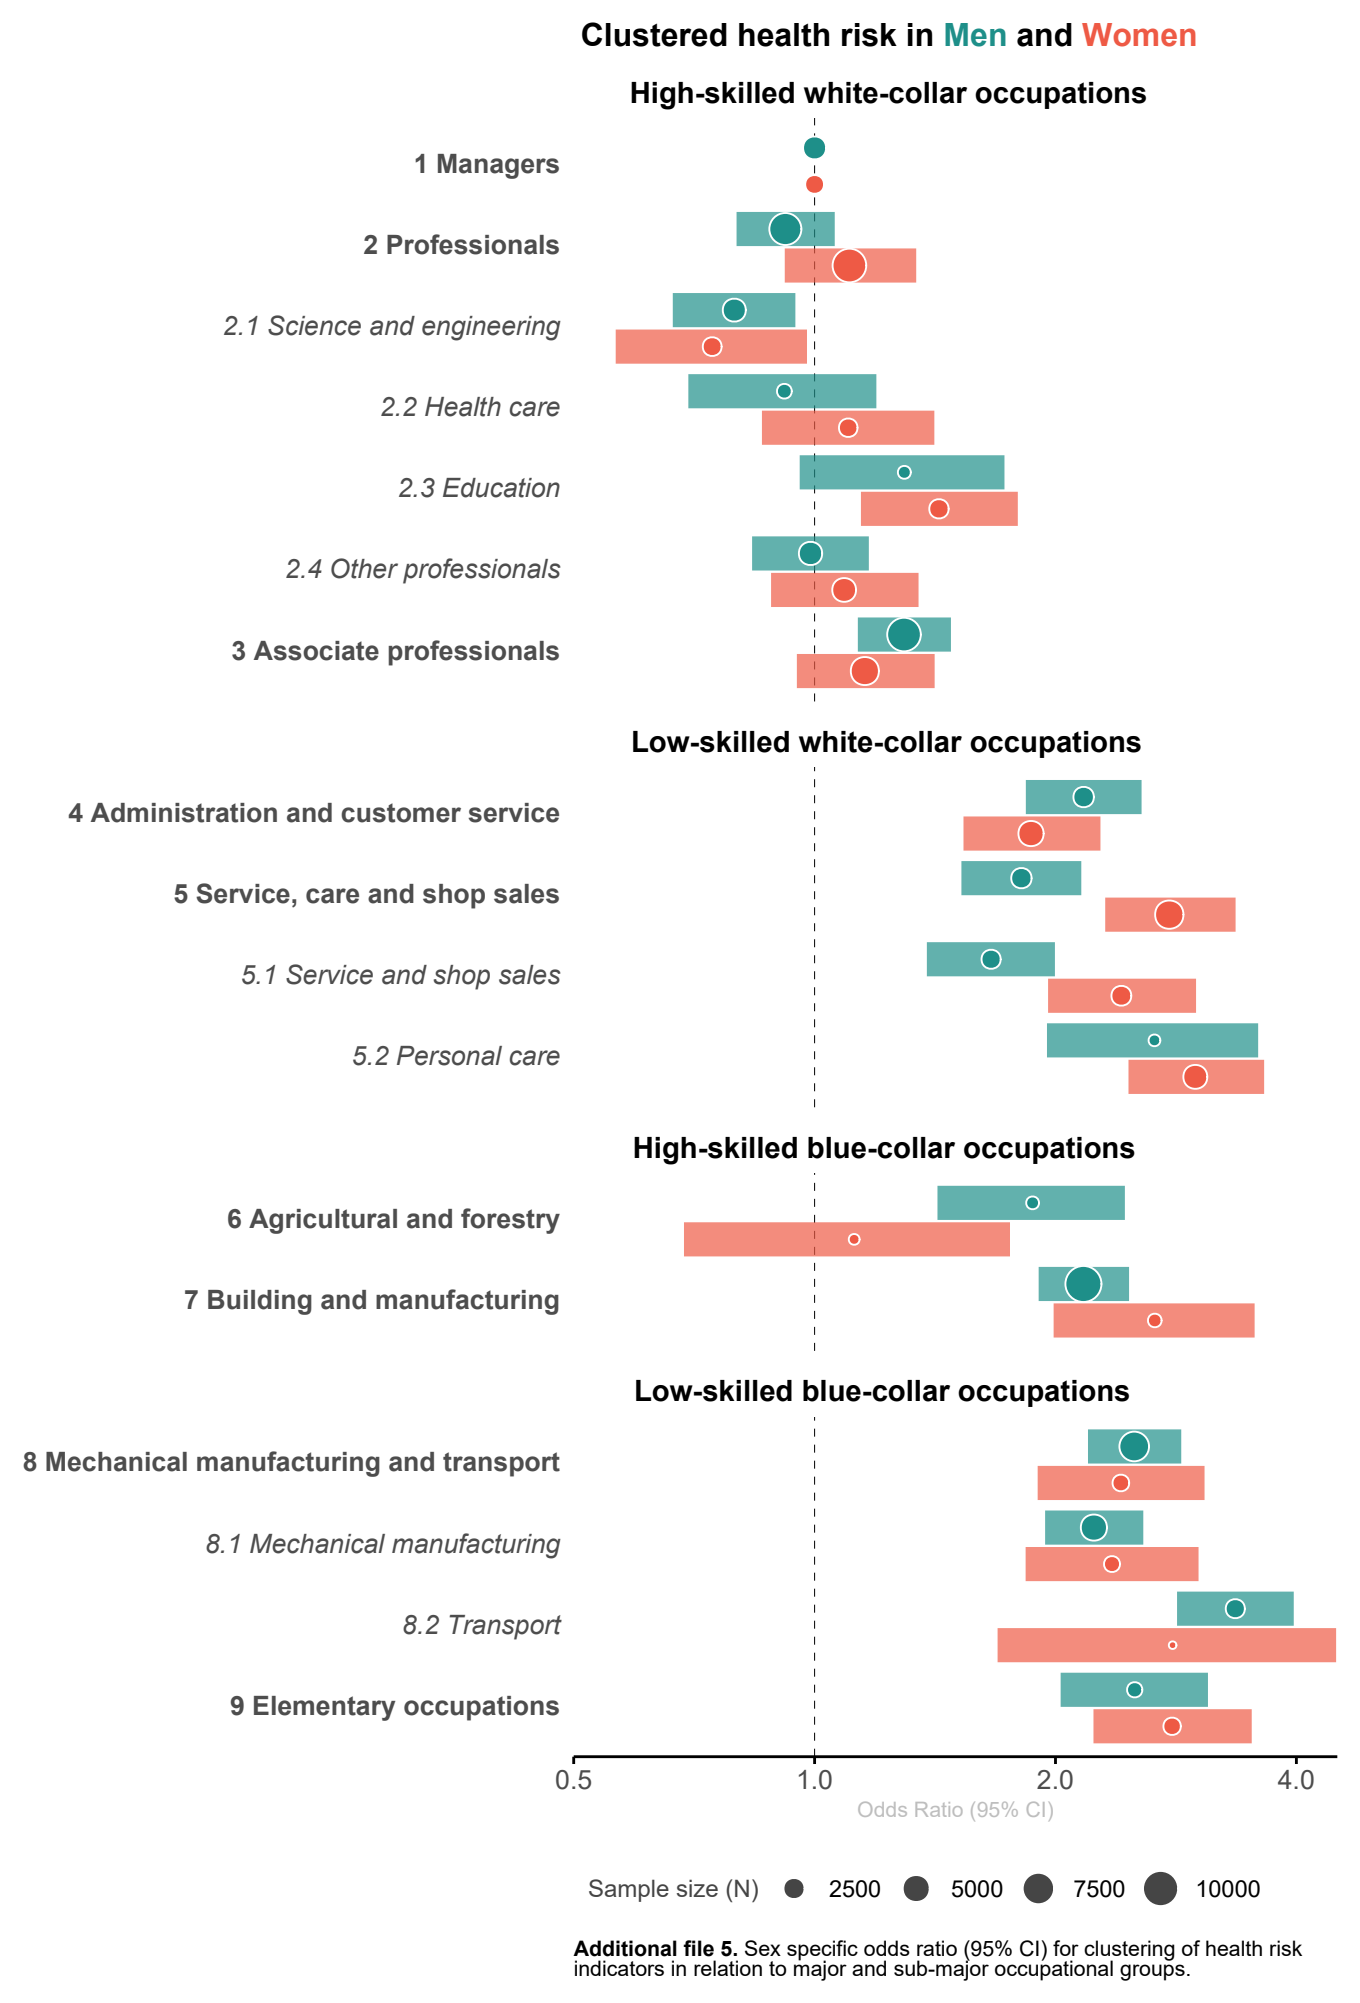

Supplement: 12889_2020_9755_MOESM5_ESM.pdf [file 12889_2020_9755_MOESM5_ESM.pdf]
